# Supplementary material for: The electrochemical failure mechanism investigation of Li1+xAlxTi2−x(PO4)3 solid-state electrolytes
Source: Royal Society of Chemistry journal article supplement (doi:10.1039/d3ta01458d), 2023-01-01
Supplement: d3ta01458d1.pdf [file d3ta01458d1.pdf]

## Supplementary Information

The Electrochemical Failure Mechanisms Investigation of the  $\text{Li}_{1+x}\text{Al}_x\text{Ti}_{2-x}(\text{PO}_4)_3$

Solid-State Electrolytes

*Can Huang, Fang Wang, Shuo Huang, Jianhe Hong, Shuoguo Yuan, Shuen Hou,*

*Hongyun Jin\**

Engineering Research Center of Nano-Geo Materials of Ministry of Education,

Faculty of Materials Science and Chemistry, China University of Geosciences,

Wuhan 430074, China

**Table S1.** Cell parameters of LATP pellet obtained by Refinement of XRD results.

| composition                                                    | a (Å)   | c (Å)    | $\alpha$ (°) | $\gamma$ (°) |
|----------------------------------------------------------------|---------|----------|--------------|--------------|
| $\text{Li}_{1.4}\text{Al}_{0.4}\text{Ti}_{1.6}(\text{PO}_4)_3$ | 8.49763 | 20.79888 | 90           | 120          |

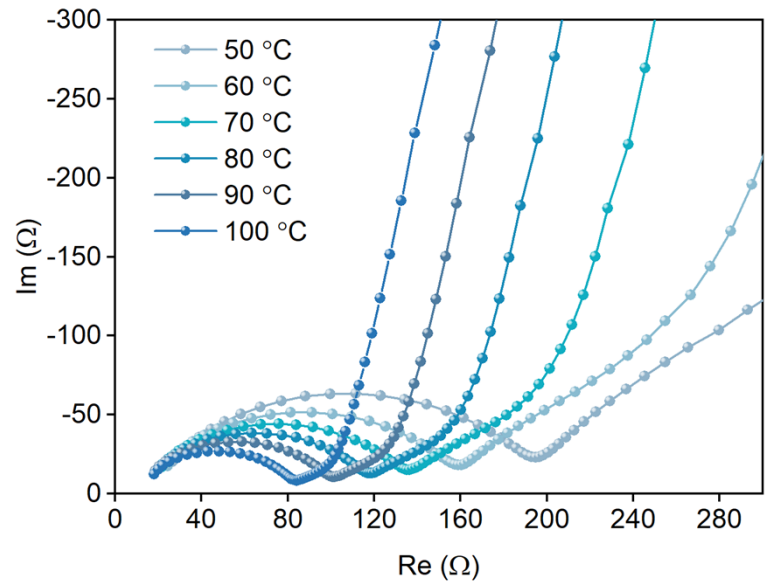

**Fig. S1.** Nyquist plot of LATP at different temperatures.

**Table S2.** Electrochemical impedance spectra fitting results of LATP pellet at different temperature.

| temperature (°C) | impedance ( $\Omega$ ) | ionic conductivity ( $S\text{ cm}^{-1}$ ) |
|------------------|------------------------|-------------------------------------------|
| 50               | 188.3                  | $3.9716 \times 10^{-4}$                   |
| 60               | 152.3                  | $4.9103 \times 10^{-4}$                   |
| 70               | 129.9                  | $5.7571 \times 10^{-4}$                   |
| 80               | 112.3                  | $6.6593 \times 10^{-4}$                   |
| 90               | 95.29                  | $7.8481 \times 10^{-4}$                   |
| 100              | 77.46                  | $9.6546 \times 10^{-4}$                   |

**Table S3.** Electrochemical impedance spectra fitting results of the Li/LATP/LFP batteries.

| cycle number | $R_{\text{bulk}}$ ( $\Omega$ ) | $R_{\text{SEI}}$ ( $\Omega$ ) | $R_{\text{ct}}$ ( $\Omega$ ) |
|--------------|--------------------------------|-------------------------------|------------------------------|
| 0            | 11.43                          | 17.15                         | 66.41                        |
| 10           | 19.69                          | 79.66                         | 177.7                        |
| 20           | 46.46                          | 98.55                         | 227.2                        |
| 30           | 48.81                          | 150.6                         | 300.9                        |
| 40           | 51.54                          | 276.8                         | 556.2                        |
| 50           | 51.94                          | 355.2                         | 845.8                        |

**Table S4.** Lithium diffusion coefficient of the Li/LATP/LFP batteries.

| cycle number | $A_w$ ( $\Omega \text{ s}^{-1/2}$ ) | $D_{\text{Li}^+}$ ( $\text{cm}^2 \text{ s}^{-1}$ ) |
|--------------|-------------------------------------|----------------------------------------------------|
| 0            | 33.67886                            | $1.8743 \times 10^{-13}$                           |
| 10           | 72.0356                             | $4.0969 \times 10^{-14}$                           |
| 20           | 92.39058                            | $2.4905 \times 10^{-14}$                           |
| 30           | 108.60832                           | $1.8023 \times 10^{-14}$                           |
| 40           | 182.81896                           | $6.3607 \times 10^{-15}$                           |
| 50           | 197.09131                           | $5.4728 \times 10^{-15}$                           |

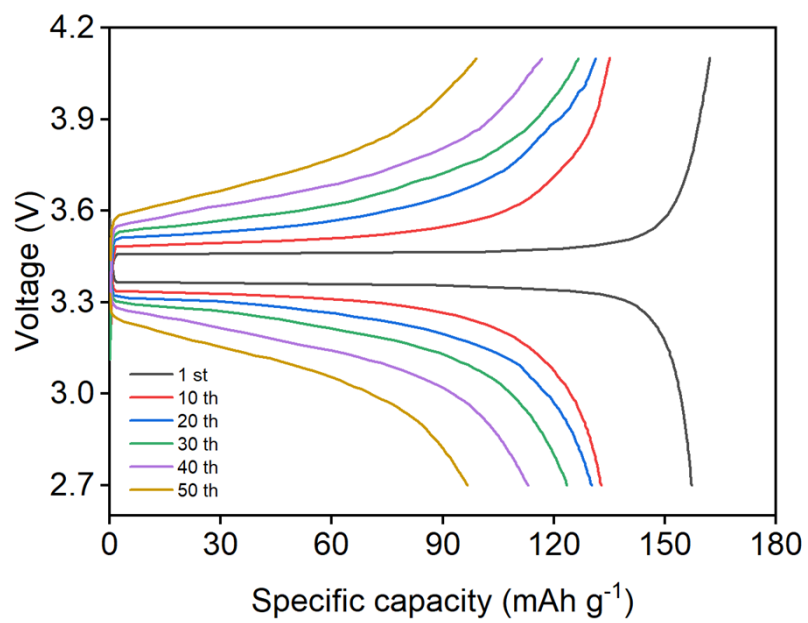

**Fig. S2.** The charge-discharge profiles of the Li/LATP/LFP batteries.

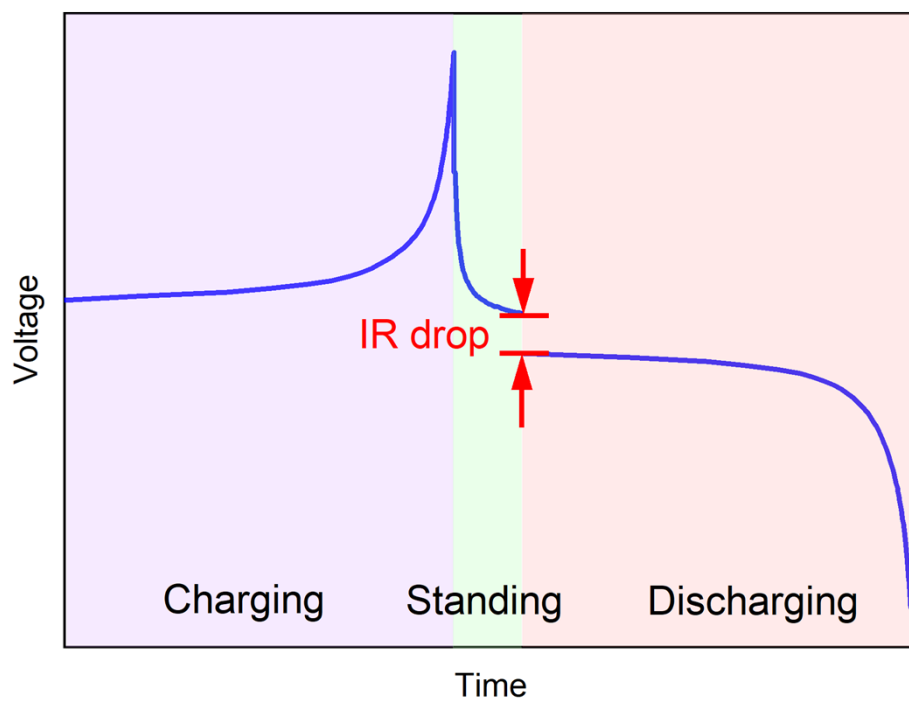

**Fig. S3** illustration of IR drop.



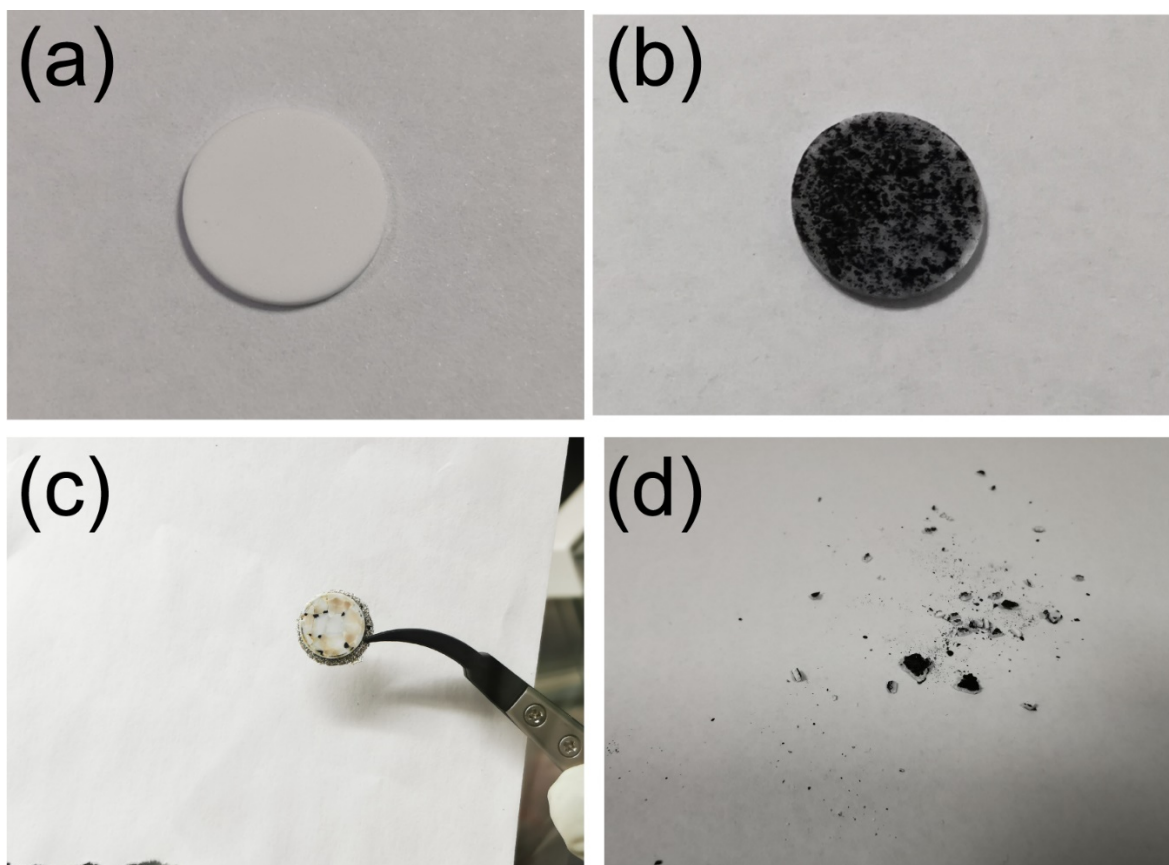

**Fig. S4.** Digital photos of (a) LATP pellet before cycling, (b) anode side of the LATP pellet after 2 cycles, (c) cathode side of LATP pellet after 50 cycles. Obvious cracks can be found on the surface of the cathode side of the LATP pellet after 50 cycles. The pellet did not collapse because of the restriction of the Li metal anode and the foamed nickel. After removing the Li metal anode and the foamed nickel (caught in the tweezers), the LATP pellet collapsed into pieces, as shown in (d) that exhibited the anode side of LATP pellet after 50 cycles.

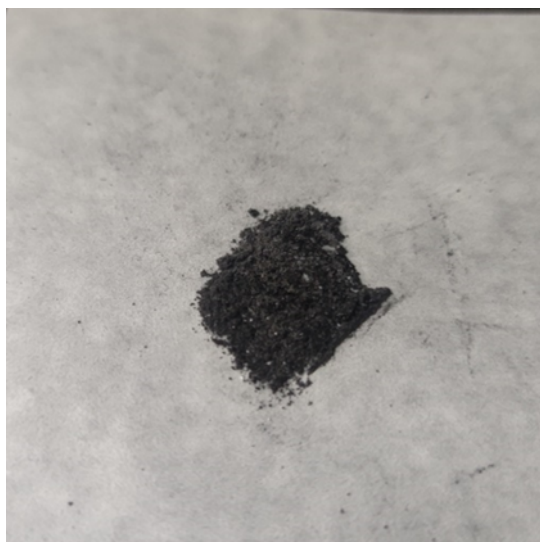

**Fig. S5.** Digital image of the decomposed LATP powder obtained from the surface of the reacted LATP pellets.

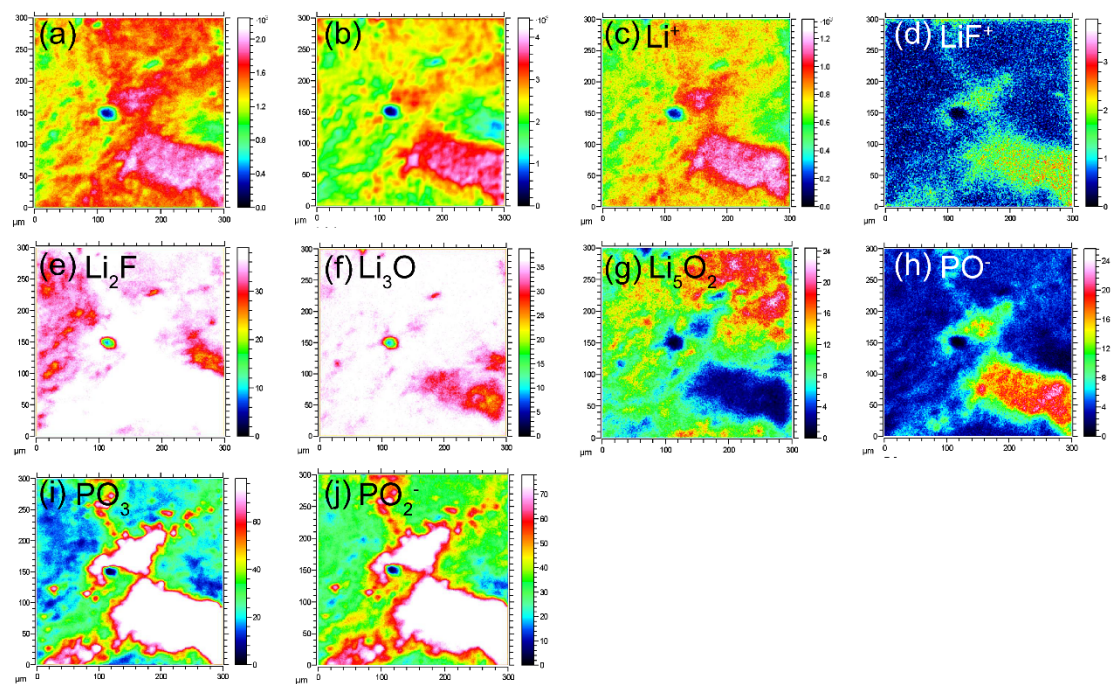

**Fig. S6.** TOF-SIMS results of the LATP pellet after 2 cycles. the total element distribution of (a) positive ion mode, and (b) negative ion mode. The distribution of (c)  $\text{Li}^+$ , (d)  $\text{LiF}^+$ , (e)  $\text{Li}_2\text{F}$ , (f)  $\text{Li}_3\text{O}$ , (g)  $\text{Li}_5\text{O}_2$ , (h)  $\text{PO}^-$ , (i)  $\text{PO}_3$ , and (j)  $\text{PO}_2^-$ .

**Table S5.** Maximum stress at different volume expansion ration obtained by FEA.

| expansion ratio (%) | maximum stress in degradation region (GPa) | maximum stress at interface region (GPa) |
|---------------------|--------------------------------------------|------------------------------------------|
| 4                   | 8.821                                      | 11.57                                    |
| 6                   | 13.23                                      | 17.35                                    |
| 8                   | 17.64                                      | 23.13                                    |
| 10                  | 22.05                                      | 28.91                                    |
| 12                  | 26.46                                      | 34.70                                    |
| 14                  | 30.87                                      | 40.48                                    |
| 16                  | 35.28                                      | 46.26                                    |
| 18                  | 39.70                                      | 52.05                                    |
| 20                  | 44.11                                      | 57.83                                    |
| 22                  | 48.52                                      | 63.61                                    |
| 24                  | 52.93                                      | 69.39                                    |

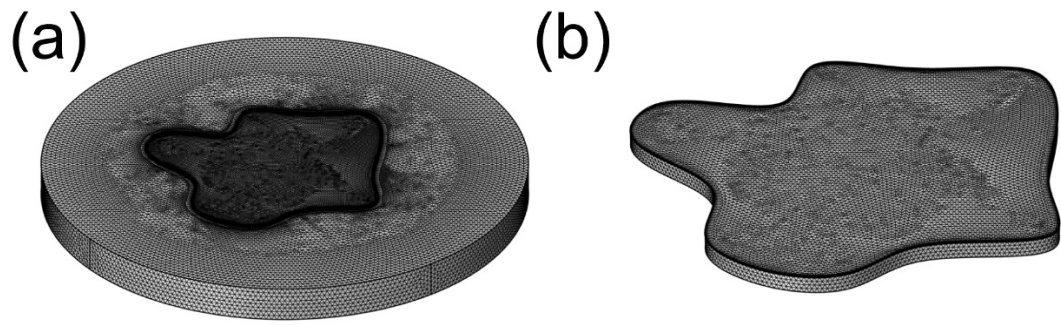

**Fig. S7.** Meshing of (a) LATP pellet and (b) enlarged decomposition region in

COMSOL.

**Table S6.** The parameters for FEA in COMSOL.

|                    | parameter           | value | unit               |
|--------------------|---------------------|-------|--------------------|
| LATP pellet        | Radius              | 55    | mm                 |
|                    | Thickness           | 8     | mm                 |
|                    | Density             | 2.95  | $\text{g cm}^{-3}$ |
|                    | Poisson's ratio     | 0.25  |                    |
|                    | Young's modulus     | 192   | GPa                |
| Degradation region | Area (% of surface) | 20    |                    |
|                    | Thickness           | 2     | mm                 |
|                    | Density             | 2.95  | $\text{g cm}^{-3}$ |
|                    | Poisson's ratio     | 0.25  |                    |
|                    | Young's modulus     | 112   | GPa                |
